# Supplementary material for: Food-borne patulin toxicity is related to gut barrier disruption and can be prevented by docosahexaenoic acid and probiotic supplementation
Source: Royal Society of Chemistry journal article supplement (doi:10.1039/c8fo02292e), 2019-01-01
Supplement: c8fo02292e1.pdf [file c8fo02292e1.pdf]

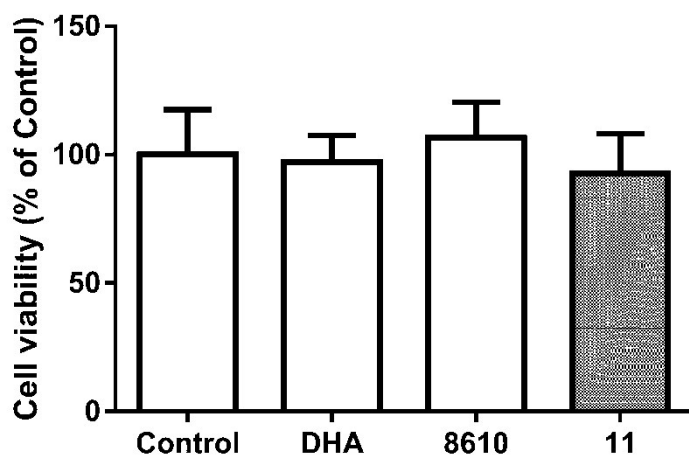

**Fig. S1** Effects of DHA or probiotics treatment alone on the Caco-2 cell viabilities, measured using the MTT method.

**Table S1** Effects of DHA and probiotics on sub-chronic PAT exposure-induced alterations in the ALT and AST activities and BUN and SCR levels in serum of mice.

| Group    | ALT activity (U/L)         | AST activity (U/L)         | BUN level (mg/dl)         | SCR (mg/dl)               |
|----------|----------------------------|----------------------------|---------------------------|---------------------------|
| Control  | 28.11 ± 3.03 <sup>a</sup>  | 60.25 ± 5.33 <sup>a</sup>  | 21.09 ± 3.21 <sup>a</sup> | 0.32 ± 0.057 <sup>a</sup> |
| PAT      | 80.54 ± 4.21 <sup>b</sup>  | 120.02 ± 5.82 <sup>b</sup> | 24.86 ± 5.24 <sup>a</sup> | 0.37 ± 0.082 <sup>a</sup> |
| PAT+DHA  | 59.38 ± 2.02 <sup>c</sup>  | 78.24 ± 3.12 <sup>c</sup>  | 25.07 ± 2.09 <sup>a</sup> | 0.40 ± 0.107 <sup>a</sup> |
| PAT+8610 | 40.07 ± 5.21 <sup>d</sup>  | 81.03 ± 4.18 <sup>c</sup>  | 22.17 ± 4.21 <sup>a</sup> | 0.40 ± 0.043 <sup>a</sup> |
| PAT+11   | 73.02 ± 6.11 <sup>bc</sup> | 91.10 ± 3.03 <sup>d</sup>  | 23.03 ± 2.17 <sup>a</sup> | 0.36 ± 0.038 <sup>a</sup> |

Values are mean ± SD values with five mice in each group. The superscript letters a, b, c and d indicate statistically significant difference at a *P* value of < 0.05 within each row comparison.

**Table S2** Effects of DHA and probiotics on sub-chronic PAT exposure-induced alterations in the GSH and MDA levels and SOD and CAT activities in the liver of mice.

| Group | GSH level (mg/g protein) | MDA level (nmol/g protein) | SOD activity (U/mg protein) | CAT activity (U/mg protein) |
|-------|--------------------------|----------------------------|-----------------------------|-----------------------------|
|-------|--------------------------|----------------------------|-----------------------------|-----------------------------|

|          |                           |                            |                           |                             |
|----------|---------------------------|----------------------------|---------------------------|-----------------------------|
| Control  | 6.21 ± 0.13 <sup>a</sup>  | 21.03 ± 2.71 <sup>a</sup>  | 78.08 ± 4.32 <sup>a</sup> | 230.55 ± 23.08 <sup>a</sup> |
| PAT      | 4.39 ± 0.47 <sup>b</sup>  | 44.19 ± 3.18 <sup>b</sup>  | 75.24 ± 2.45 <sup>a</sup> | 167.17 ± 20.13 <sup>b</sup> |
| PAT+DHA  | 5.18 ± 0.32 <sup>ab</sup> | 31.06 ± 1.75 <sup>c</sup>  | 71.28 ± 2.48 <sup>a</sup> | 190.11 ± 5.08 <sup>ab</sup> |
| PAT+8610 | 5.58 ± 0.76 <sup>ab</sup> | 23.13 ± 2.00 <sup>a</sup>  | 71.07 ± 4.39 <sup>a</sup> | 231.07 ± 8.53 <sup>a</sup>  |
| PAT+11   | 4.97 ± 0.52 <sup>ab</sup> | 38.17 ± 4.10 <sup>bc</sup> | 73.28 ± 2.17 <sup>a</sup> | 170.20 ± 11.05 <sup>b</sup> |

Values are mean ± SD values with five mice in each group. The superscript letters a, b, c and d indicate statistically significant difference at a *P* value of < 0.05 within each row comparison.
